## CORRECTION

# Correction: Evaluating the foundations that help avert antimicrobial resistance: Performance of essential water sanitation and hygiene functions in hospitals and requirements for action in Kenya

The *PLOS ONE* Staff

## Notice of republication

An incorrect grant number was included in the XML of this article. The article was republished on January 13, 2020, to correct for this error. The publisher apologizes for this error.

## Reference

1. Maina M, Tosas-Auguet O, McKnight J, Zosi M, Kimemia G, Mwaniki P, et al. (2019) Evaluating the foundations that help avert antimicrobial resistance: Performance of essential water sanitation and hygiene functions in hospitals and requirements for action in Kenya. *PLoS ONE* 14(10): e0222922. <https://doi.org/10.1371/journal.pone.0222922> PMID: 31596861

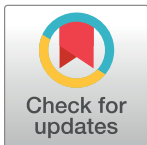

## OPEN ACCESS

**Citation:** The *PLOS ONE* Staff (2020) Correction: Evaluating the foundations that help avert antimicrobial resistance: Performance of essential water sanitation and hygiene functions in hospitals and requirements for action in Kenya. *PLoS ONE* 15(1): e0228489. <https://doi.org/10.1371/journal.pone.0228489>

**Published:** January 24, 2020

**Copyright:** © 2020 The PLOS ONE Staff. This is an open access article distributed under the terms of the [Creative Commons Attribution License](https://creativecommons.org/licenses/by/4.0/), which permits unrestricted use, distribution, and reproduction in any medium, provided the original author and source are credited.
